# Supplementary material for: Basal sauropodomorph locomotion: ichnological lessons from the Late Triassic trackways of bipeds and quadrupeds (Elliot Formation, main Karoo Basin)
Source: PeerJ. 2023 Sep 28;11:e15970. doi: 10.7717/peerj.15970 (PMC10542822; doi:10.7717/peerj.15970)
Supplement: Supplemental Information 3 — Abbreviations as stated in text with the MP scale referencing Marchetti et al. (2019). Measurements in cm unless stated. [file peerj-11-15970-s003.xlsx]

## Sheet: Table S1. 
Table S1. All collated data for the LEF Norian tetradactyl trackways. Abbreviations as stated in text with the MP scale referencing Marchetti et al. (2019). Measurements in cm unless stated.
		Pes tracks (cm)									Manus tracks (cm)					Trackway data								Body size and speed estimates					MP scale
		PL	I	II	III	IV	PW	TfIV-Tm	PL/PW	I^IV ( °)		ML	MW	ML/MW	MW/PL	Pes tracks	Pes Pace (cm)	Stride, λ (cm)	TW	PTR	Pes Pace angulation	Manus Pace (cm)	Manus Pace angulation	Gleno-acetabular distance (m)	Hip height, h (m)	Pes gait (λ/h)	Speed for gait <2.0, ms-2	Speed km/h
PT1	Pes 1	57	45	60	57	54	64	25	0.890625	60	manus 1	12	30	0.4		1--2	125	213	86	0.744186	138	112	30.5	1.2	228				2
	Pes 2	57	44	52	57	53	50	20	1.14	60	manus 2		27			2--3	107		78	0.641026		123	34		228				2
	Pes 3	53	46		53	53	65	24	0.815385	72	manus 3	11	31	0.354839		3--4	122	218			137				212				2
	Pes 4	56	42	52	56	51	46		1.21739	53	manus 4														224				2
	Average	55.75	44.25	54.6667	55.75	52.75	56.25	23	1.01585	61.25	Average	11.5	29.3333	0.377419	1.90057	Average	118	215.5	82	0.692606	137.5	117.5	32.25	1.2	2.23	0.966368	1.10381	3.97371
	Std. dev	1.89297	1.70783	4.6188	1.89297	1.25831	9.67385	2.64575	0.193132	7.88987	Std. dev	0.707107	2.08167	0.0319339		Std. dev	9.64365	3.53553	5.65685	0.0729454	0.707107	7.77817	2.47487		7.57188
PT2	Pes 1	49	36	48	49	44	55	44	0.890909	68	manus 1	11	28	0.392857		1--2	122	241	85	0.647059		137	97	1.43	196				2
	Pes 2	54	44	50	54	50	35		1.54286	58	manus 2	13	33	0.393939		2--3	133				138	147	96		216				2
	Pes 3	49	41	50	49	51	35	43	1.4	67	manus 3	12	27	0.444444		3--4	95	254			128	110			196				1.5
	Pes 4	50	43	41	50			68			manus 4	20	29	0.689655		4--x					?174				200				1.5
	Pes 6	47	36	44	47	42	44		1.06818	59	manus5					4--6	171					165			188				2
	Average	49.8	40	46.6	49.8	46.75	42.25	51.6667	1.22549	63	Average	14	29.25	0.480224	1.70256	Average	130.25	247.5	85	0.647059	133	131.333	96.5	1.43	1.992	1.24247	1.58729	5.71423
	Std. dev	2.58844	3.80789	3.97492	2.58844	4.42531	9.5	14.1539	0.298812	5.22813	Std. dev	4.08248	2.62996	0.14168		Std. dev	31.5106	9.19239			7.07107	22.9692	0.707107		10.3537
PT3	Pes 1	38					37		1.02703	53	no manus					1--2	117	160	91	0.406593	130				185.6				1.5
	Pes 2	53					35		1.51429	52						2--3	111		85	0.411765	130								1.5
	Pes 3	46					34		1.35294	49						3--4	118	168	93	0.365591	135								1.5
	Pes 4	48					39		1.23077							4--5	123				130								1.5
	Pes 5	47					36		1.30556	49						5--6	109												1.5
	Pes 6						35									6--7	118												1
	Pes 7						39																						1
	Average	46.4					36.4286		1.28612	50.75						Average	116	164	89.6667	0.39465	131.25				1.856	0.883621	0.867174	3.12182
	Std. dev	5.41295					1.98806		0.178252	2.06155						Std. dev	5.13809	5.65685	4.16333	0.0252978	2.5
MP1	Pes 1	45	44	45	45		42		1.07143	57	manus 0	12	30	0.4	0.666667	1--2	132	187	107	0.392523	95	130	122	138	180	1.03315			1.5
	Pes 2	46	39	44	46	42	43		1.06977	59	manus 1	11	23	0.478261	0.5	2--3	125	193	100	0.43	103	102	103		184	1.0663			1.5
	Pes 3	44	43	45	44	41	45		0.977778	50	manus 2	13	28	0.464286	0.636364	3--4	123					122			176				1.5
	Pes 4	46	41	45	46	42	42		1.09524	54	manus 3	14	29	0.482759	0.630435										184				1.5
	Average	45.25	41.75	44.75	45.25	41.6667	43		1.05355	55	Average	12.5	27.5	0.456326	0.608366	Average	126.667	190	103.5	0.411262	99	118	112.5	1.38	1.81	1.04972	1.14179	4.11046
	Std. dev	0.957427	2.21736	0.5	0.957427	0.57735	1.41421		0.0518394	3.91578	Std. dev	1.29099	3.10913	0.0383658	0.0739663	Std. dev	4.72582	4.24264	4.94975	0.0265	5.65685	14.4222	13.435		3.82971	0.02344
HF1	Pes 1	43	39	40	41	32	39		1.05128	57	manus 1	32	25	1.28		1--2	111	182	99	0.393939	108	157	72	132	172	1.05814			2
	Pes 2	47	41	43	46	41	44		1.04545	58	manus 2	33	16	2.0625		2--3	119	200	81	0.54321	126	170	90		188	1.16279			2
	Pes 3	37	41	43	44	41	43		1.02326	55	manus 3	31	30	1.03333		3--4	109	181	95	0.452632	113	133			148				2
	Pes 4		42	45	47	41	39		1.20513	58	manus 4	25	14	1.78571		4--5	108			0.458824					168				2
	Pes 5	44	45	48	49	43	41		1.19512	53	no manus														176				2
	Average	45.4	41.6	43.8	45.4	39.6	41.2		1.10405	56.2	Average	30.25	21.25	1.42353	2.13647	Average	111.75	187.667	91.6667	0.462151	115.667	153.333	81	1.32	1.704	1.10133	1.2003	4.32108
	Std. dev	4.19325	2.19089	2.94958	3.04959	4.3359	2.28035		0.0883975	2.16795	Std. dev	3.59398	7.54431	0.468221		Std. dev	4.99166	10.6927	9.45163	0.0614412	9.29157	18.7705	12.7279		16.452	0.0739995
LB1	Pes_28B	44	22	36	44	43	38		1.15789	57	no manus						68	116	61	0.622951	109								1.5
	Pes_28C	41	32	38	41	32	32		1.28125	58							74												1.5
	Pes_28labelledC	36	29	34	36	35	29		1.24138	55																			1.5
	Average	40.3333	27.6667	36	40.3333	36.6667	33		1.22684	56.6667						Average	71	116	61	0.622951	109				1.61333	0.719008	0.573008	2.06283
	Std. dev	4.04145	5.1316	2	4.04145	5.68624	4.58258		0.0629495	1.52753						Std. dev	4.24264
